# Supplementary material for: Prevalence and prognosis of hyperdynamic left ventricular systolic function in septic patients: a systematic review and meta-analysis
Source: Springer Nature journal article supplement (doi:10.1186/s13613-024-01255-9), 2024-02-03

# Supplemental Figure S1

## Sensitivity analysis including various definitions of hyperdynamic LV systolic function

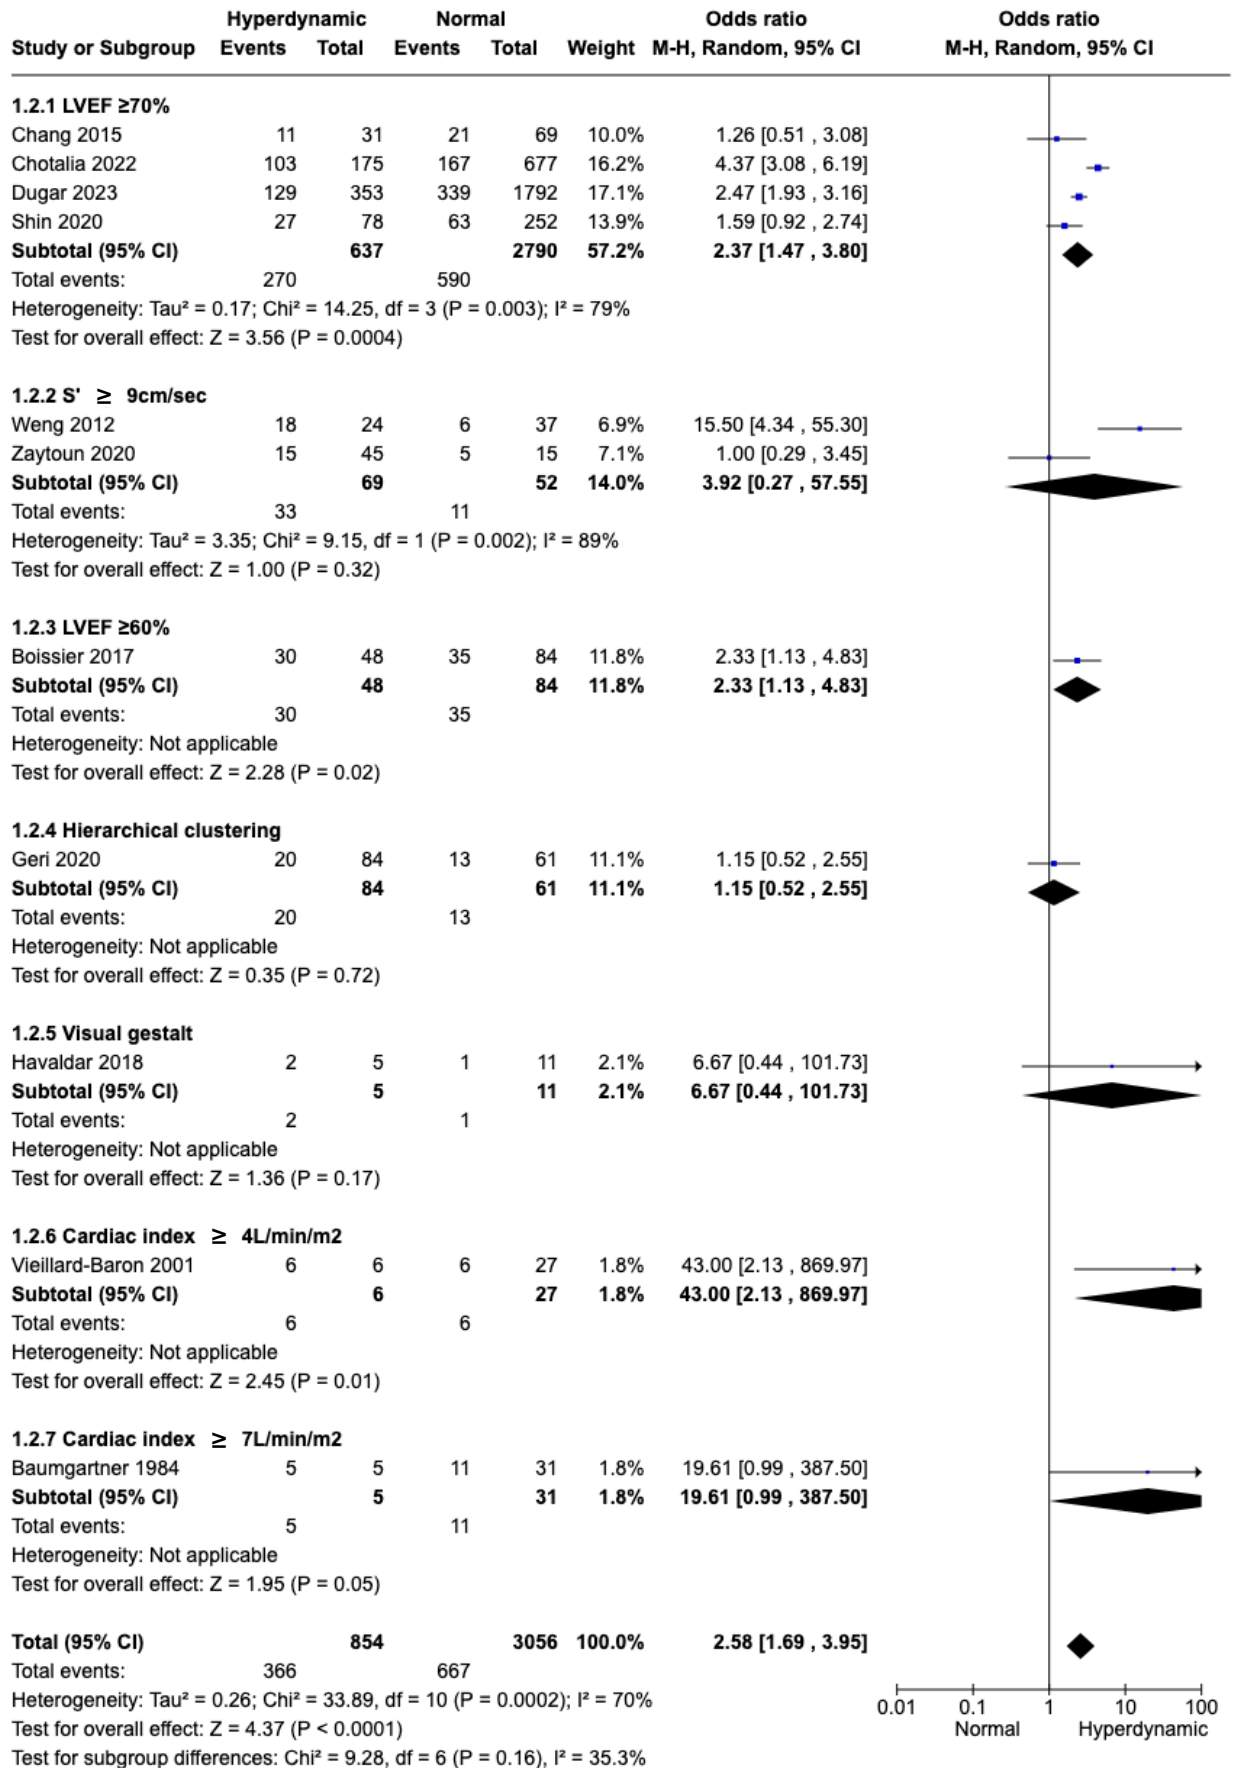

Supplement: MOESM1 [file 13613_2024_1255_MOESM1_ESM.pdf]
